# 1           **Rapid learning and unlearning of predicted** 2           **sensory delays in self-generated touch**

3  
4           Konstantina Kilteni<sup>1\*</sup>, Christian Houborg<sup>1</sup>, and H. Henrik Ehrsson<sup>1</sup>

5  
6  
7           <sup>1</sup>Department of Neuroscience, Karolinska Institutet, Solnavägen 9, 17165 Stockholm,  
8           Sweden

9  
10          \*Correspondence: [konstantina.kilteni@ki.se](mailto:konstantina.kilteni@ki.se)

11  
12  
13

## 14          **Abstract**

15          Self-generated touch feels less intense and less ticklish than identical externally  
16          generated touch. This somatosensory attenuation occurs because the brain predicts the  
17          tactile consequences of our self-generated movements. To produce attenuation, the  
18          tactile predictions need to be time-locked to the movement, but how the brain maintains  
19          this temporal tuning remains unknown. Using a bimanual self-touch paradigm, we  
20          demonstrate that people can rapidly unlearn to attenuate touch immediately after their  
21          movement and learn to attenuate delayed touch instead, after repeated exposure to a  
22          systematic delay between the movement and the resulting touch. The magnitudes of the  
23          unlearning and learning effects are correlated and dependent on the number of trials  
24          that participants have been exposed to. We further show that delayed touches feel less  
25          ticklish and non-delayed touches more ticklish after exposure to the systematic delay.  
26          These findings demonstrate that the attenuation of self-generated touch is adaptive.

27  
28

## 29          **Keywords**

30          somatosensory attenuation, sensorimotor delays, prediction errors, forward models,  
31          tickling; motor learning

## 32 Introduction

33 It is theorized that the brain uses internal models to anticipate the sensory consequences  
34 of voluntary movements on the basis of a copy of the motor command (efference copy)  
35 [1–4]. These sensory predictions are used to achieve efficient online motor control, to  
36 ensure movement stability and to reduce uncertainty, as the actual sensory feedback is  
37 delayed due to sensory transduction times [5–7]. In addition, the predictions of the  
38 internal models are also used for attenuating the perception of self-produced input,  
39 thereby increasing the salience of unpredicted external signals and facilitating the  
40 perceptual distinction between the self and the environment [8,9]. For example, when  
41 one actively touches one’s left hand with one’s right (self-touch), the touch feels less  
42 intense than identical touches applied to the left hand by another person or a machine  
43 [8,10,11]. This is because the self-induced touch has been predicted by the internal  
44 model.

45  
46 Importantly, the predictions of the internal models are useful only if the models  
47 constitute accurate representations of the body and the current environmental dynamics  
48 [1,7,12–15]. Biased predictions would not only be detrimental to motor performance  
49 but also prevent one from distinguishing the sensory feedback of one’s own movements  
50 from that produced by external causes. A good illustration of this sharp tuning of the  
51 internal models is that their predictions are temporally locked to the given movement  
52 (**Fig. 1a**, left): for example, during self-touch, tactile feedback is expected at the time  
53 of contact between the hands, and touch that is artificially delayed (even by only 100  
54 ms) shows reduced attenuation and is attributed to external causes rather than the self  
55 [11,16].

56  
57 Here, we demonstrate that the brain can rapidly (a) unlearn to expect touch at the  
58 moment of contact between the hands and (b) learn to predict delayed touch instead.  
59 Using a device that simulates bimanual self-touch (**Fig. 1b**), thirty subjects were  
60 initially exposed to 500 trials in which a systematic delay of 0 ms or 100 ms (*exposure*  
61 *delay*) was inserted between the voluntary tap of the right index finger and the resulting  
62 touch on the pulp of the relaxed left index finger [17] (**Fig. 1c**). We reasoned that when  
63 repeatedly presented with the 100 ms discrepancy between the predicted and actual  
64 somatosensory feedback, the brain would be forced to retune the internal model in order  
65 to account for this delay and thus keep the predictions accurate (**Fig. 1a**, middle). This  
66 hypothesis led to two specific predictions (**Fig. 1a**, right). First, when the 100 ms delay  
67 is removed after the exposure period, participants should have stopped predicting and  
68 therefore attenuating the sensation of the tap. Second, when the delay is maintained  
69 after the exposure period, the participants should have started predicting and thus  
70 attenuating the delayed tap. We tested both of these predictions in a psychophysical  
71 task [16] performed immediately after the initial exposure (**Fig. 1d**) (see also *Materials*  
72 *and Methods*).

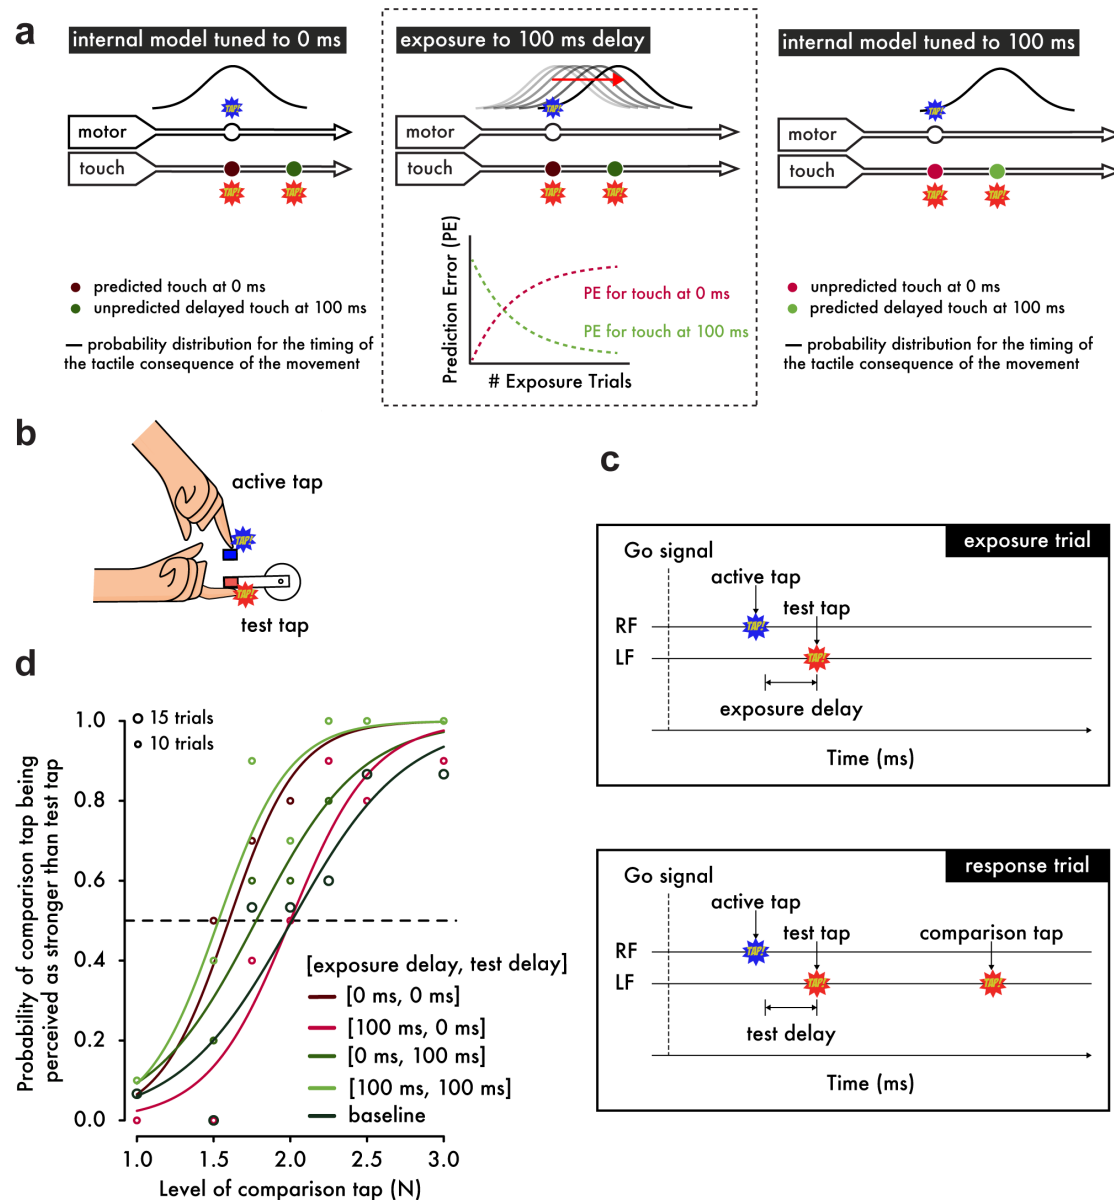

73

74

**Figure 1 | Experimental Hypotheses, Procedures and Psychophysical Analysis. (a)** (Left)

75

When the internal model is tuned to 0 ms as in natural situations, the probability distribution

76

for the occurrence of touch on the left index finger (approximated as a normal distribution [16])

77

peaks at 0 ms after the movement of the right index finger. Touch presented at 0 ms shows the

78

strongest attenuation, while touch at 100 ms is less attenuated because it is less likely to have

79

been self-generated. (Middle) When exposed to systematic delays of 100 ms between the finger

80

movement and the touch, the model parameter is gradually updated to 100 ms, which can be

81

viewed as a simple incremental shift in the probability distribution by 100 ms. Before the

82

exposure, there is an error associated with the touch predicted at 0 ms and presented at 100 ms

83

but no error related to the naturally presented touch at 0 ms. During the learning period, this

84

pattern gradually reverses: a prediction error for the touch presented at 0 ms appears and grows

85

over exposure time, while the prediction error for the touch at 100 ms decays and reaches a

86

minimum. (Right) After prolonged exposure, the touch at 0 ms has low probability, produces a

87

large prediction error and will not be attenuated, whereas the touch at 100 ms has high

88

probability, produces no prediction error and will be attenuated. (b) Participants were instructed

89

to use their right index finger to tap a sensor (active tap) that delivered a tap on their left index

90 finger (test tap). (c) In the *exposure trials*, participants simply tapped the sensor with their right  
91 index finger (RF) and received the tap on the left index finger (LF) with a 0 ms or a 100 ms  
92 *exposure delay*. In the *response trials*, participants received a second tap on their left index  
93 finger (comparison tap) and were required to indicate which tap was stronger: the test or the  
94 comparison tap. The test tap could be presented with a *test delay* of either 0 ms or 100 ms. (d)  
95 Psychophysical data from a representative participant demonstrate how the somatosensory  
96 attenuation phenomenon is quantified. The horizontal dashed line indicates the 50% point of  
97 psychometric functions, and the circle size represents the number of trials.

98

## 99 Results and Discussion

100 In the response trials of the task, participants were presented with two taps on the left  
101 index finger – one test tap of 2 N presented at 0 ms or 100 ms after the right finger’s  
102 active tap (*test delay*) and one comparison tap of variable magnitude – and their task  
103 was to indicate which one felt stronger (**Fig. 1c**). The points of subjective equality  
104 (PSEs) extracted from the psychophysical curves represent the attenuation of the test  
105 tap and are displayed in **Fig. 2a** for each pair of exposure and test delay. A no-  
106 movement condition where the participants simply relaxed their right hand served as a  
107 baseline for basic somatosensory perception.

108

109 As expected from previous studies [11,16], when participants were exposed to a 0 ms  
110 delay, attenuation was observed only for the immediate test tap (paired t-test between  
111 [exposure delay = 0 ms, test delay = 0 ms] and baseline,  $t(29) = -4.84$ ,  $p < 0.001$ ,  $CI^{95}$   
112 = [-0.190, -0.077]) and not for the delayed touch (paired Wilcoxon test between [0 ms,  
113 100 ms] and baseline,  $n = 30$ ,  $V = 217$ ,  $p = 0.761$ ,  $CI^{95} = [-0.065, 0.058]$ ). In line with  
114 this pattern, the immediate tap felt significantly less intense than the delayed one (paired  
115 Wilcoxon test between [0 ms, 0 ms] and [0 ms, 100 ms],  $n = 30$ ,  $V = 15$ ,  $p < 0.001$ ,  $CI^{95}$   
116 = [-0.180, -0.086]). Importantly however, the pattern of results reversed after exposure  
117 to a 100 ms delay: the attenuation of the immediate tap significantly decreased (paired  
118 t-test between [100 ms, 0 ms] and [0 ms, 0 ms],  $t(29) = 3.03$ ,  $p = 0.005$ ,  $CI^{95} = [0.025,$   
119  $0.131]$ ) and tended no longer to be significantly different from the baseline (paired t-  
120 test between [100 ms, 0 ms] and baseline,  $t(29) = -1.74$ ,  $p = 0.092$ ,  $CI^{95} = [-0.121, 0.01]$ ).  
121 This decrease in attenuation of immediate touch (**Fig. 2c**) indicates that participants  
122 *unlearned* to predict touch at the time of contact. In contrast, the attenuation of the  
123 delayed tap significantly increased (paired t-test between [100 ms, 100 ms] and [0 ms,  
124 100 ms],  $t(29) = -3.52$ ,  $p = 0.001$ ,  $CI^{95} = [-0.143, -0.038]$ ) and it now significantly  
125 differed from the baseline (paired t-test between [100 ms, 100 ms] and baseline,  $t(29)$   
126  $= -2.24$ ,  $p = 0.033$ ,  $CI^{95} = [-0.15, -0.007]$ ). This shift in attenuation of the delayed touch  
127 (**Fig. 2d**) indicates that participants *learned* to predict the touch at the delay to which  
128 they were exposed. Importantly, the extent to which participants unlearned to predict  
129 the immediate touch was significantly positively correlated with the extent to which  
130 participants learned to predict the delayed one (Pearson’s  $r = 0.473$ ,  $t(28) = 2.84$ ,  $p =$   
131  $0.008$ ,  $CI^{95} = [0.136, 0.712]$ ); **Fig. 2b**), implying a temporal shift in the probability  
132 distribution of the tactile consequences in line with our hypothesized model (**Fig. 1a**,  
133 middle and right). Finally, we noted that there were no significant differences in the

134 participants' discrimination ability, i.e., just noticeable difference, between conditions  
135 (paired t-test between [0 ms, 0 ms] and [100 ms, 0 ms],  $t(29) = -0.64$ ,  $p = 0.528$ ,  $CI^{95} =$   
136  $[-0.030, 0.016]$ ); paired t-test between [0 ms, 100 ms] and [100 ms, 100 ms],  $t(29) =$   
137  $0.73$ ,  $p = 0.473$ ,  $CI^{95} = [-0.020, 0.043]$ ). This finding excludes the presence of response  
138 sensitivity differences between conditions as an alternative explanation of the present  
139 results. Taken together, these findings suggest that the internal model generating the  
140 tactile predictions that produce the somatosensory attenuation can be temporally  
141 retuned.

142

143 To quantitatively strengthen our conclusion that the abovementioned findings are due  
144 to the retuning of the internal model, we performed an additional experiment in which  
145 we explicitly tested our theoretical prediction that the longer the participants are  
146 exposed to the systematic delays between movement and touch, the larger the temporal  
147 shift in the probability distribution of the internal model will be, and therefore the larger  
148 the perceptual effects on somatosensory attenuation will be (**Fig. 1a**, middle). Two new  
149 groups of fifteen participants each were continuously presented with 100 ms exposure  
150 trials while being tested for the attenuation of immediate (**Fig. 2e**) or delayed touch  
151 (**Fig. 2f**) after 0, 50, 200 and 500 exposure trials. The results revealed a significant  
152 effect of number of exposure trials in the learning and unlearning of the tested delays:  
153 the attenuation of immediate touch [100 ms, 0 ms] decreased significantly as the  
154 number of exposure trials increased ( $F(3,42) = 4.92$ ,  $p = 0.005$ ), while the attenuation  
155 of delayed touch [100 ms, 100 ms] increased significantly as the number of exposure  
156 trials increased ( $F(3,42) = 5.27$ ,  $p = 0.004$ ). Replicating our previous results, the  
157 pairwise comparisons indicated a significant decrease in the attenuation of immediate  
158 touch after 200 exposure trials ( $t(14) = -2.94$ ,  $p = 0.011$ ,  $CI^{95} = [-0.180, -0.028]$ ) and  
159 500 exposure trials ( $t(14) = -2.62$ ,  $p = 0.020$ ,  $CI^{95} = [-0.196, -0.019]$ ) compared to the  
160 initial performance after 0 exposure trials, as well as a significant increase in the  
161 attenuation of the delayed touch after 50 exposure trials ( $t(14) = 3.44$ ,  $p = 0.004$ ,  $CI^{95} =$   
162  $[0.025, 0.110]$ ), 200 exposure trials ( $t(14) = 2.76$ ,  $p = 0.015$ ,  $CI^{95} = [0.020, 0.161]$ ) and  
163 500 exposure trials ( $t(14) = 3.40$ ,  $p = 0.004$ ,  $CI^{95} = [0.035, 0.152]$ ) compared to the  
164 initial test. Collectively, these results demonstrate that the retuning of the internal model  
165 underlying somatosensory attenuation occurs through error-driven processes that  
166 evolve over time in response to repeated exposure to unexpected delays in the  
167 sensorimotor system.

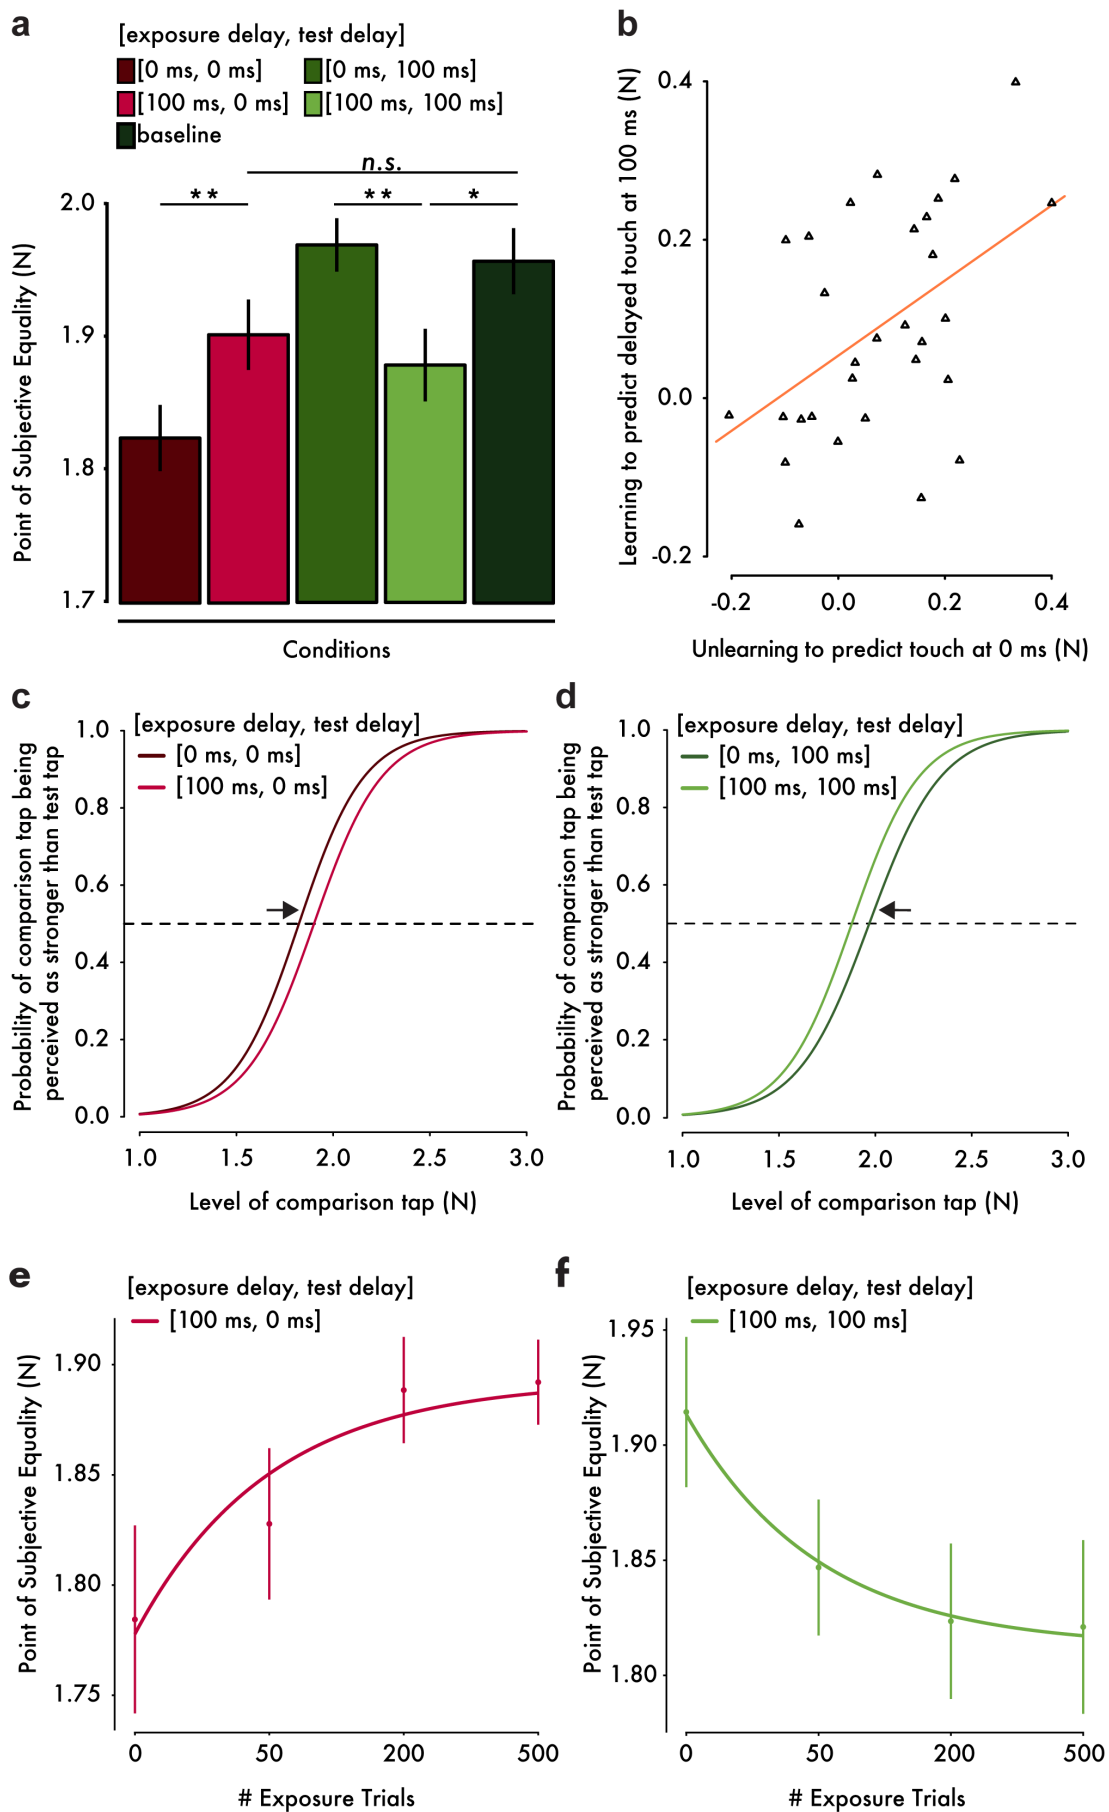

169 **Figure 2 | Results from the somatosensory attenuation experiments. (a)** Mean PSE ( $\pm$   
170 s.e.m.) for each condition. Only the important planned comparisons are displayed ( $*p < 0.05$ ,  
171  $**p < 0.01$ , *n.s.* not significant). **(b)** Scatterplot of the attenuation shifts in immediate touch  
172 (unlearning) and delayed touch (learning). The more participants unlearned to predict the  
173 immediate touch, the more they learned to predict the delayed one. The orange line indicates  
174 the fitted regression line. **(c, d)** Group psychometric functions indicating significant attenuation  
175 shifts for immediate **(c)** and delayed touch **(d)**. **(e, f)** Mean PSE ( $\pm$  s.e.m.) as a function of the  
176 number of exposure trials. Unlearning and learning curves were fitted with an exponential  
177 model.

178

179 Somatosensory attenuation is considered one of the reasons for which we cannot tickle  
180 ourselves [18]. Accordingly, self-tickling sensations are cancelled because the  
181 somatosensory feedback of our movement matches the tactile prediction of the internal  
182 model and thus gets attenuated. In contrast, ticklish sensations arise from discrepancies  
183 (prediction errors) between the predicted feedback of the internal model and the actual  
184 somatosensory input [8]. An earlier study showed that participants rated their self-  
185 generated touch as more ticklish when a delay greater than 100 ms was introduced  
186 between the movement of one hand and the resulting touch on the other, compared to  
187 when a 0 ms delay was introduced. We hypothesized that after exposure to systematic  
188 delays the delayed self-generated touch would feel less ticklish because the retuning of  
189 the internal model of somatosensory attenuation would reduce this delay-induced  
190 prediction error (**Fig. 1a**, middle). Reversely, natural (non-delayed) self-generated  
191 touch would feel more ticklish since the prediction error between the delayed prediction  
192 and the immediate tactile feedback would increase after the exposure.

193

194 To this end, we performed an additional experiment in which a new group of thirty  
195 participants moved the arm of a robot with their right hand to apply touch on their left  
196 forearm through a second robot. The second robot (slave) copied the movement of the  
197 first robot (master) either with a 0 ms or a 150 ms delay (**Fig. 3a**). As expected from  
198 the literature, after exposure to the 0 ms delay participants judged more frequently the  
199 delayed touch as being more ticklish than the immediate touch (median frequency =  
200 0.8, mean frequency = 0.73). Critically, after exposure to the 150 ms delay, this  
201 frequency significantly dropped (median frequency 0.6, mean frequency 0.65):  $t(29) =$   
202  $2.28$ ,  $p = 0.030$ ,  $CI^{95} = [0.009, 0.158]$  (**Fig. 3b**). That is, the delayed touch was rated  
203 significantly less frequently as the more ticklish one, or, reversely, the immediate touch  
204 was rated significantly more frequently as the more ticklish one. This result suggests  
205 that ticklishness sensations depend on the same learning mechanism that supports the  
206 attenuation of self-touch, thereby generalizing our findings beyond force intensity  
207 perception and suggesting a universal role of the sensory predictions –generated by a  
208 continuously retuned internal model– in the perceptual discrimination of self and non-  
209 self.

210

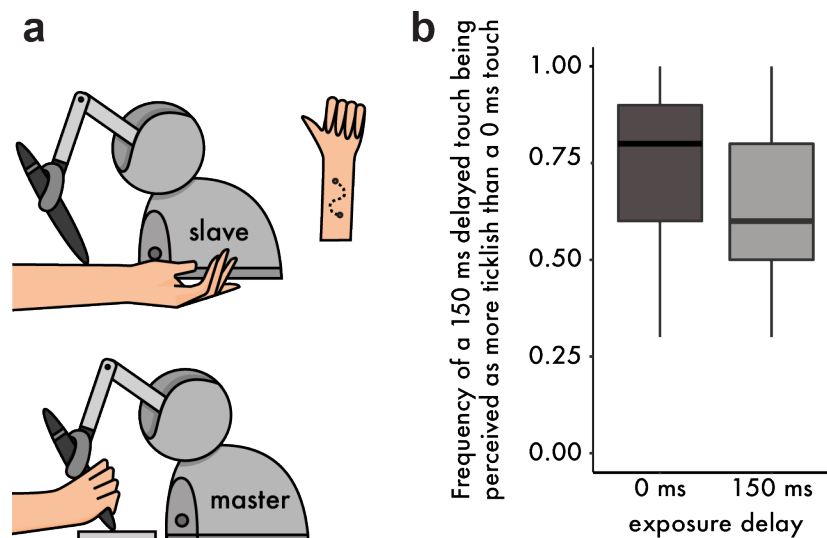

211

212 **Figure 3 | Methods and Results from the tickling experiment. (a)** Participants were  
213 instructed to move the stylus of a robot with their right hand (master robot). The stylus was free  
214 to move along a sinusoidal path within a 3D-printed mold, thus constraining the movement  
215 trajectory. A second robot (slave) copied the master robot and delivered the touch on the volar  
216 (anterior) part of their left forearm. Participants were asked to perform two sinusoidal  
217 movements (twice back and forth) with their right hand and received two stimulations on the  
218 left forearm (one with a 0 ms and one with a 150 ms delay). Afterwards they had to indicate  
219 which touch felt more ticklish. **(b)** Boxplot of the frequencies at which participants rated the  
220 delayed touch (150 ms) as more ticklish than the immediate touch. After exposure to the 150  
221 ms delay, participants chose the delayed touch less frequently (or reversely, they chose the  
222 immediate touch with higher frequency). The horizontal black bars represent the medians, and  
223 the boxes denote the interquartile ranges.

224

225 The present study investigated the temporal retuning of the internal model underlying  
226 the perceptual attenuation of self-generated touch, the latter being a well-established  
227 index of the efference-copy-based sensory predictions [1,8,9,16]. Our findings are  
228 strongly consistent with a gradual updating of the internal model during exposure to  
229 systematic delays between the movement and the tactile feedback from the resulting  
230 self-touch (**Fig. 1a**). After exposure to such delays, the delayed touch was predicted  
231 and thus attenuated, while the immediate (non-delayed) touch was not predicted and  
232 thus not attenuated. Moreover, the magnitudes of these effects were correlated and  
233 dependent on the number of exposure trials, in line with our proposal that the retuning  
234 of the internal model was driven by a prediction-error-based learning process. Finally,  
235 we demonstrated that this dynamic retuning of the internal model influences the  
236 perceived ticklishness of tactile stimulation, so that delayed touches feel less ticklish  
237 and non-delayed touches more ticklish after exposure to systematic delays. This  
238 demonstrates that the predictive learning process under discussion affects the  
239 perceptual quality of touch as being self- or externally generated beyond the mere  
240 intensity of the somatosensory feedback. Taken together, the present study brings  
241 compelling evidence that somatosensory attenuation is an adaptive phenomenon.

242



243 We propose that the internal model underlying somatosensory attenuation during  
244 normal temporal conditions is dynamically retuned in presence of systematic delays, to  
245 encode the new temporal relationship between the motor command and the tactile  
246 consequence. Rather than the adaptation of an existing internal model, it could be  
247 argued that the exposure to the delays leads to the acquisition of a new internal model  
248 instead. In a bimanual object manipulation task, Witney et al. [19] demonstrated a  
249 significant grip force modulation after repeated exposure to a systematic delay between  
250 the movement of one hand and the resulting effects on the other hand, in a direction  
251 that is consistent with the acquisition of new internal model rather than the update of  
252 an existing one. According to this proposal, the brain would learn different internal  
253 models for the different delays and would switch between them [20]. Our data cannot  
254 differentiate between these two hypotheses since in both scenarios we would expect a  
255 decrease in the attenuation of the immediate touch and an increase in the attenuation of  
256 delayed touch. Moreover, it is not known whether the same internal model underlies  
257 the anticipatory grip force modulation during object manipulation and the sensory  
258 attenuation during self-touch. Nevertheless, based on the correlation between the shifts  
259 in the attenuation of immediate touch and the attenuation of delayed touch (**Fig. 2e-f**),  
260 we consider that a shift in the predicted temporal distribution towards the newly  
261 predicted timing (update of an existing internal model) is more likely than the  
262 acquisition of a new one.

263  
264 Our study goes beyond earlier studies on crossmodal lag adaptation and sensorimotor  
265 temporal recalibration (see [21,22] for reviews). By employing the self-touch paradigm,  
266 we kept the relationship between the movement and its feedback from the body natural,  
267 in contrast to previous studies that provided participants with artificial feedback, e.g.  
268 visual flashes on the screen [17,23] or white noise bursts [24] in response to keypresses.  
269 Most importantly, rather than measuring changes in the perceived order of the  
270 participants' movements and those associated external events – effects present in mere  
271 crossmodal asynchronies [25–27] in the absence of movement– we measured the  
272 attenuation of self-generated touch that requires active movement [16] and thus,  
273 efference-copy-based predictions.

274  
275 What could be the neural mechanism of the temporal retuning of the internal model  
276 underlying somatosensory attenuation? A candidate brain area is the cerebellum, given  
277 its involvement in the implementation of the internal models [13], its well-established  
278 relationship with motor learning [28] and somatosensory attenuation [18,29] and its  
279 relevance to time perception and temporal coordination of movement according to  
280 evidence from nonhuman primates [30], cerebellar patients [31] and healthy subjects  
281 [32]. A mechanism through which the cerebellum could acquire prior distributions of  
282 time intervals has recently been suggested [33]. Given that maintaining unbiased  
283 sensorimotor predictions is the root of motor learning [12,28,34], we propose that the  
284 observed effects are a new form of learning that represents the updating of the internal  
285 model's parameter specifying the temporal relationship between the motor command  
286 and its sensory feedback from the body. In contrast to the classically studied motor

287 (force-field and visuomotor) adaptation paradigms [12,34], the present learning occurs  
288 in the temporal rather than the spatial domain, and it serves to keep the sensorimotor  
289 predictions regarding one's own body [35] temporally tuned. This space-time analogy  
290 becomes more apparent when we consider that our observed temporal aftereffects – i.e.  
291 the reduced attenuation observed during 0 ms delay after exposure to the 100 ms –  
292 mirror the classic spatial aftereffects (e.g. reaching errors) observed in force-field and  
293 visuomotor adaptation after removing the spatial perturbation participants have been  
294 exposed to [12]).

295  
296 The adaptive nature of sensory attenuation has broad implications for cognitive  
297 neuroscience beyond motor control. Accurate comparisons of predicted and actual  
298 sensory feedback underpin the distinction of self and environment [36–39], the  
299 perception of ticklishness [11] and the sense of agency, i.e., the sense of being the  
300 author of voluntary action [40]. The present results reveal how such fundamental  
301 cognitive distinctions between the self and external causes are supported by a dynamic  
302 and flexible error-driven learning process. Indeed, the data from our tickling experiment  
303 submit that it is possible to learn to tickle oneself: after the retuning of the internal  
304 model to the delay, natural (non-delayed) self-touch feels more intense and more  
305 ticklish, as an external touch does.

306  
307 Our findings on learning and unlearning mechanisms could have important clinical  
308 relevance for schizophrenia research. In healthy subjects, reduced sensory attenuation  
309 was associated with a high tendency towards delusional ideation [41], and the frequency  
310 of passivity experiences in non-pathological subjects with high schizotypal traits was  
311 related to increased ticklishness ratings for self-produced touch [42]. Similarly,  
312 schizophrenic patients [43,44] and patients with auditory hallucinations and/or  
313 passivity experiences [45] were shown to exhibit reduced attenuation of their self-  
314 generated touches with respect to matched controls, with the severity of the  
315 schizophrenic patients' hallucinations being a predictor of their reduced somatosensory  
316 attenuation [44]. This relationship between somatosensory attenuation and  
317 schizophrenia was proposed to reflect deficits in the patients' internal models  
318 mechanisms [46]. Specifically, Whitford et al. [47] proposed that schizophrenia is  
319 related to an abnormal myelination of frontal white matter that produces delays in the  
320 generation of the predicted consequences based on the efference copy (internal model).  
321 That is, the predicted timing of the sensory feedback lags the movement and feedback  
322 time and therefore, non-delayed feedback (0 ms) comes before its predicted time and it  
323 is not attenuated, thereby producing uncertainty about the origin of the signal (the self  
324 or the others). In agreement with this view, a study using encephalography showed that  
325 schizophrenic patients exhibited reduced cortical suppression of self-generated sounds  
326 when these were presented without delay but normal attenuation when presented with  
327 a delay, compared to healthy controls [48]. Accordingly, we theorize that schizophrenic  
328 patients would perceive their delayed touch as less intense and less ticklish, reflecting  
329 an internal model erroneously tuned at that delay; a prediction that should be tested in  
330 future experiments.

331

332 More fundamentally, since our study suggests that sensory attenuation relies on online  
333 updating prediction estimations it opens up for the possibility that it could be this  
334 learning process that is impaired in schizophrenia. We therefore speculate that  
335 schizophrenic patients might have no problem in generating motor commands or  
336 generating sensory predictions as such, but it is the continuous updating of these  
337 predictions that is impaired. In other words, rather than a structural change *per se*  
338 causing the changes in sensory attenuation, it might be that it is the inability to retune  
339 the internal model to compensate for these changes in the brain that is causing the  
340 cognitive deficits and psychiatric symptoms. We therefore propose that future  
341 computational psychiatry research should specifically investigate the capacity of these  
342 individuals to learn and unlearn new temporal relationships between their movements  
343 and their sensory feedback.

344

## 345 **Materials and Methods**

### 346 **Materials**

347 In all conditions, participants rested their left hand, palm up, with the left index finger  
348 placed inside a molded support. Participants received forces on the pulp of their left  
349 index finger from a cylindrical probe (20 mm diameter) that was attached to a lever  
350 controlled by a DC electric motor (Maxon EC Motor EC 90 flat; manufactured in  
351 Switzerland). The right hand and forearm were comfortably placed on top of boxes  
352 made of sponge, with the right index finger resting on top of a force sensor  
353 (FSG15N1A, Honeywell Inc.; diameter, 5 mm; minimum resolution, 0.01 N; response  
354 time, 1 ms; measurement range, 0–15 N). The force sensor was placed on top of (but  
355 not in contact with) the cylindrical probe that was contacting their relaxed left index.

356

357 A screen blocked the participants' view of their hands and forearms during all  
358 conditions, and the participants were further asked to fixate their gaze on a fixation  
359 cross marked at 2 meters across from them. In addition, participants were wearing  
360 headphones through which white noise was administered so that no sound created either  
361 by the motor or by the right hand's tap could be used as a cue for the psychophysics  
362 task. An auditory cue (tone) served to indicate to participants when to press the force  
363 sensor with their right index finger during the task.

364

### 365 **Participants**

366 After providing written informed consent, thirty naïve participants (15 women and 15  
367 men, 27 right-handed and 3 ambidextrous [49]) aged 18-32 years participated in the  
368 experiment. The sample size was decided based on previous studies [17,23].

369

### 370 **Conditions and Procedures**

371 The experiment included five conditions: four movement conditions and one baseline  
372 (no movement) condition. Each movement condition included both *exposure* and  
373 *response* trials. The baseline condition assessed the participants' somatosensory

374 perception of two successive taps on the left index finger without any movement of the  
375 right index finger and thus included only response trials.

376

### 377 Exposure trials

378 On each exposure trial (**Fig. 1c**), participants tapped the force sensor with their right  
379 index finger (active tap) after an auditory cue. This tap triggered the test tap on their  
380 left index finger. The test tap could be presented either with a 0 ms delay – therefore  
381 simulating self-touch – or with a 100 ms delay (*exposure delay*).

382

### 383 Response trials

384 In each response trial (**Fig. 1c**), as in the exposure trials, participants tapped the force  
385 sensor after the auditory cue and received the test tap on their left index finger with a  
386 delay of either 0 ms or 100 ms (*test delay*). After a random delay of 800-1500 ms from  
387 the test tap, a second tap (comparison tap) was delivered to the left index finger, and  
388 participants were required to indicate using a foot pedal which tap (the test tap or the  
389 comparison tap) was stronger. The test tap was always 2 N, while the intensity of the  
390 comparison tap was systematically varied among seven different force levels (1, 1.5,  
391 1.75, 2, 2.25, 2.5 or 3 N). Both test and comparison taps had a fixed duration of 100 ms  
392 each. In a short session just before the experiment, we taught participants how to tap  
393 the sensor with their right index finger to prevent them from pressing too forcefully or  
394 too gently during the experiment. This psychophysical task has been previously  
395 validated to assess the magnitude of somatosensory attenuation [16].

396

397 The four movement conditions corresponded to the four combinations of exposure and  
398 test delay levels: [0 ms, 0 ms], [0 ms, 100 ms], [100 ms, 0 ms], and [100 ms, 100 ms].  
399 Each movement condition consisted of 500 initial exposure trials (to 0 ms or 100 ms)  
400 and 70 response trials (each of the 7 intensities of the comparison tap was repeated 10  
401 times). Each response trial followed 5 re-exposure trials, resulting in 850 exposure trials  
402 in total, per condition. The baseline condition consisted of 105 response trials (each of  
403 the 7 intensities of the comparison tap was repeated 15 times).

404

405 No feedback was ever provided to subjects with respect to their performance on the  
406 psychophysical task. The order in which the volunteers participated in the conditions  
407 was randomized. As a technical side note, the intrinsic delay of our system was 35 ms;  
408 therefore, the experimental conditions labeled ‘0 ms’ and ‘100 ms’ actually correspond  
409 to effective delays of 35 ms and 135 ms.

410

### 411 **Data and Statistical Analysis**

412 For each condition, we used a logistic regression model to fit the proportion of the  
413 participants’ responses that the comparison tap was stronger than the test tap (**Eq. 1**,  
414 **Fig. 1d**):

415

$$416 \quad f(x) = \frac{1}{1 + \exp(-(a + \beta x))} \quad (1)$$

417

418 where  $\alpha$  represents the intercept and  $\beta$  represents the slope. We used the function *glm*  
419 with a *logit* link function in the software R version 3.3.2. We extracted the point of  
420 subjective equality (PSE), which corresponds to the intensity of the comparison tap at  
421 which the participant perceives the test tap (2 N) and the comparison tap as equal ( $p =$   
422 0.5). Furthermore, we extracted the just noticeable difference (JND), an index of the  
423 participant's response sensitivity.

424

425 We checked the normality of the distributions of PSEs and JNDs with Shapiro-Wilk  
426 tests. Accordingly, we performed planned comparisons with either a paired t-test or a  
427 Wilcoxon signed-rank test. To test for perceptual shifts due to the 100 ms exposure  
428 delays, we contrasted the conditions featuring a 100 ms exposure delay with those  
429 featuring a 0 ms exposure delay for the same test delay. We also compared all the  
430 movement conditions with the baseline condition. To calculate the correlation  
431 coefficient between the attenuation shift of immediate touch (unlearning, i.e., PSE at  
432 [100 ms, 0 ms] - PSS at [0 ms, 0 ms]) and the attenuation shift of delayed touch  
433 (learning, i.e., PSE at [0 ms, 100 ms] - PSS at [100 ms, 100 ms]), we used the Pearson  
434 correlation coefficient, since the data were normally distributed. All statistical tests  
435 were two-tailed. As mentioned above, for the group psychometric functions (**Fig. 2c-**  
436 **d**), we generated the plots using the mean PSE and the mean JND across the thirty  
437 participants.

438

### 439 **Participants, Procedure and Analysis in the Effect of Exposure Experiment**

440 We performed an additional experiment in which a new set of 30 naïve volunteers (12  
441 women and 18 men, all 30 right-handed [49]) aged 18-35 years participated after  
442 providing written informed consent. Each participant was exposed to 500 trials with a  
443 systematic delay of 100 ms. Half of the participants were tested for the attenuation of  
444 the immediate touch [100 ms, 0 ms], and the other half were tested for the attenuation  
445 of the delayed touch [100 ms, 100 ms]. The psychophysical tests were performed at the  
446 beginning of the experiment (no initial exposure) and then at three time points spaced  
447 at intervals of 50, 150, and 300 exposure trials. That is, participants performed the  
448 psychophysical task after 0, 50, 200 and 500 cumulative initial exposure trials. One  
449 response (out of seventy) was missing for one participant in one psychophysical test.  
450 For each experiment, we performed a repeated-measures analysis of variance  
451 (ANOVA) on the PSEs with time as the within-participants factor. We then performed  
452 planned comparisons using paired t-tests, since all distributions satisfied the assumption  
453 of normality.

454

### 455 **Participants, Procedure and Analysis in the Tickling Experiment**

456 A new set of 30 naïve volunteers (16 women and 14 men, 28 right-handed, 1  
457 ambidextrous and 1 left-handed [49]) aged 20-38 years participated in the Tickling  
458 experiment after providing written informed consent. Two robots (Touch™ Haptic  
459 Devices, 3D systems, <https://www.3dsystems.com/haptics-devices/touch>) were placed

460 in front of the participants with a distance of 10 cm between them. Participants rested  
461 their left arm palm up within a forearm support made of sponge, just beneath the stylus  
462 of a robot (*slave* robot). The tip of the stylus was covered with sponge to reduce its  
463 sharpness. Participants rested their right elbow on an arm support and grabbed with  
464 their right hand the stylus of another robot (*master* robot). The lower part of the stylus  
465 of the master robot could freely move within a sinusoidal 3D printed path. The distal  
466 point of the path (the one closest to the hand) served as a starting point. Each trial lasted  
467 three seconds and upon an auditory cue, participants were asked to move the stylus  
468 from the distal point (**Fig. 3a**) to the proximal point along the path, and back to the  
469 distal point. In two different conditions, participants performed 50 exposure trials with  
470 a systematic delay of 0 or 150 ms between the movement of the master robot and the  
471 movement (and stimulation) of the slave robot (*exposure delay*). In the response trials,  
472 as in the exposure trials, participants performed two consecutive trials (the first with a  
473 0 ms and the second with a 150 ms delay). Immediately afterwards, they were asked to  
474 report which of the two stimulations on their left forearm (the first or the second) felt  
475 more ticklish to them. As in the previous experiments, each response trial followed 5  
476 re-exposure trials. There were 10 response trials per condition. The order in which the  
477 volunteers participated in the conditions was counterbalanced. We calculated the  
478 frequency at which participants judged the second (150 ms) touch as more ticklish in  
479 the two conditions. The data could be approximated by a normal distribution (Shapiro  
480 -Wilk test) and thus we performed the planned comparison using a paired t-test.

481

482 In the tickling experiment, we chose a delay of 150 ms and not a delay of 100 ms as in  
483 the sensory attenuation experiments. This was because our pilot tickling experiments  
484 indicated that a 100 ms delay was not sufficient to differentiate the perception of a  
485 delayed stroke on the arm from that of an immediate stroke. We consider that this  
486 asymmetry of the delay sensitivity between attenuation and tickling should not be  
487 surprising: a 100 ms delay would be more salient for a self-induced tap of 100 ms  
488 duration than a continuous stroke of 3 seconds duration.

489

## 490 **Acknowledgements**

491 Konstantina Kilteni was supported by the Marie Skłodowska-Curie Intra-European  
492 Individual Fellowship (#704438). The project was funded by the Swedish Research  
493 Council, the Göran Gustafssons Stiftelse and the Torsten Söderbergs Stiftelse.

494

## 495 **Author Contributions**

496 Konstantina Kilteni and H. Henrik Ehrsson conceived the experiment. Konstantina  
497 Kilteni, H. Henrik Ehrsson and Christian Houborg designed the experiment. Christian  
498 Houborg collected the data of the two experiments on somatosensory attenuation.  
499 Konstantina Kilteni collected the data of the tickling experiment. Konstantina Kilteni  
500 conducted the statistical analysis. Konstantina Kilteni and H. Henrik Ehrsson wrote the  
501 manuscript, and Christian Houborg read and approved the final version.

502

## 503 **Competing interests**

504 The authors declare no competing interests.

505

## 506 **References**

- 507 1. Wolpert, D.M., and Flanagan, J.R. (2001). Motor prediction. *Curr. Biol.* *11*, R729–  
508 R732.
- 509 2. Bays, P.M., and Wolpert, D.M. (2007). Computational principles of sensorimotor  
510 control that minimize uncertainty and variability. *J. Physiol.* *578*, 387–396.
- 511 3. Franklin, D.W., and Wolpert, D.M. (2011). Computational mechanisms of  
512 sensorimotor control. *Neuron* *72*, 425–442.
- 513 4. Blakemore, S.J., Goodbody, S.J., and Wolpert, D.M. (1998). Predicting the  
514 consequences of our own actions: the role of sensorimotor context estimation. *J.*  
515 *Neurosci.* *18*, 7511–7518.
- 516 5. Kawato, M. (1999). Internal models for motor control and trajectory planning. *Curr*  
517 *Opin Neurobiol* *9*, 718–727.
- 518 6. Davidson, P.R., and Wolpert, D.M. (2005). Widespread access to predictive models in  
519 the motor system: a short review. *J. Neural Eng.* *2*, S313–S319.
- 520 7. Shadmehr, R., and Krakauer, J.W. (2008). A computational neuroanatomy for motor  
521 control. *Exp. Brain Res.* *185*, 359–381.
- 522 8. Blakemore, S.J., Wolpert, D.M., and Frith, C. (2000). Why can't you tickle yourself?  
523 *Neuroreport* *11*, R11–R16.
- 524 9. Bays, P.M., and Wolpert, D.M. (2008). Predictive attenuation in the perception of  
525 touch. In *Sensorimotor Foundations of Higher Cognition*, E. P. Haggard, Y. Rosetti,  
526 and M. Kawato, eds. (Oxford University Press), pp. 339–358.
- 527 10. Shergill, S.S., Bays, P.M., Frith, C.D., and Wolpert, D.M. (2003). Two eyes for an  
528 eye: the neuroscience of force escalation. *Science* *301*, 187. Available at:  
529 <http://www.ncbi.nlm.nih.gov/pubmed/12855800>.
- 530 11. Blakemore, S.J., Frith, C.D., and Wolpert, D.M. (1999). Spatio-temporal prediction  
531 modulates the perception of self-produced stimuli. *J. Cogn. Neurosci.* *11*, 551–559.
- 532 12. Shadmehr, R., Smith, M. a, and Krakauer, J.W. (2010). Error correction, sensory  
533 prediction, and adaptation in motor control. *Annu. Rev. Neurosci.* *33*, 89–108.  
534 Available at: <http://www.ncbi.nlm.nih.gov/pubmed/20367317> [Accessed July 9,  
535 2014].
- 536 13. Wolpert, D.M., Miall, R.C., and Kawato, M. (1998). Internal models in the  
537 cerebellum. *Trends Cogn. Sci.* *2*, 338–347.
- 538 14. Miall, C. (2002). Modular motor learning. *Trends Cogn. Sci.* *6*, 1–3.
- 539 15. Haith, A.M., and Krakauer, J.W. (2013). Model-based and model-free mechanisms of  
540 human motor learning. *Adv. Exp. Med. Biol.* *782*, 1–21.
- 541 16. Bays, P.M., Wolpert, D.M., and Flanagan, J.R. (2005). Perception of the consequences  
542 of self-action is temporally tuned and event driven. *Curr. Biol.* *15*, 1125–1128.
- 543 17. Stetson, C., Cui, X., Montague, P.R., and Eagleman, D.M. (2006). Motor-Sensory  
544 Recalibration Leads to an Illusory Reversal of Action and Sensation. *Neuron* *51*, 651–  
545 659.
- 546 18. Blakemore, S.J., Wolpert, D.M., and Frith, C.D. (1998). Central cancellation of self-  
547 produced tickle sensation. *Nat. Neurosci.* *1*, 635–640.
- 548 19. Witney, A.G., Goodbody, S.J., and Wolpert, D.M. (1999). Predictive Motor Learning  
549 of Temporal Delays. *J. Neurophysiol.* *82*, 2039–2048.
- 550 20. Wolpert, D.M., and Kawato, M. (1998). Multiple paired forward and inverse models  
551 for motor control. *Neural Networks* *11*, 1317–1329.
- 552 21. Chen, L., and Vroomen, J. (2013). Intersensory binding across space and time: A  
553 tutorial review. *Attention, Perception, Psychophys.*

- 554 22. Rohde, M., and Ernst, M.O. (2016). Time, agency, and sensory feedback delays during  
555 action. *Curr. Opin. Behav. Sci.*
- 556 23. Cai, M., Stetson, C., and Eagleman, D.M. (2012). A neural model for temporal order  
557 judgments and their active recalibration: A common mechanism for space and time?  
558 *Front. Psychol.* 3.
- 559 24. Heron, J., Hanson, J.V.M., and Whitaker, D. (2009). Effect before cause: Supramodal  
560 recalibration of sensorimotor timing. *PLoS One* 4.
- 561 25. Vroomen, J., Keetels, M., De Gelder, B., and Bertelson, P. (2004). Recalibration of  
562 temporal order perception by exposure to audio-visual asynchrony. *Cogn. Brain Res.*
- 563 26. Fujisaki, W., Shimojo, S., Kashino, M., and Nishida, S. (2004). Recalibration of  
564 audiovisual simultaneity. *Nat. Neurosci.* 7, 773–778.
- 565 27. Hanson, J.V.M., Heron, J., and Whitaker, D. (2008). Recalibration of perceived time  
566 across sensory modalities. *Exp. Brain Res.*
- 567 28. Wolpert, D., Diedrichsen, J., and Flanagan (2011). Principles of sensorimotor learning.  
568 *Nat. Rev. Neurosci.* 12. Available at: <http://discovery.ucl.ac.uk/1326668/>.
- 569 29. Kilteni, K., and Ehrsson, H. (2019). Functional connectivity between cerebellum and  
570 somatosensory areas reflects the attenuation of self-generated touch. *Under Rev.*
- 571 30. Ashmore, R.C., and Sommer, M.A. (2013). Delay activity of saccade-related neurons  
572 in the caudal dentate nucleus of the macaque cerebellum. *J. Neurophysiol.* 109, 2129–  
573 2144. Available at: <http://jn.physiology.org/cgi/doi/10.1152/jn.00906.2011>.
- 574 31. Ivry, R.B., and Keele, S.W. (1989). Timing Functions of The Cerebellum. *J. Cogn.*  
575 *Neurosci.* 1, 136–152. Available at:  
576 <http://www.mitpressjournals.org/doi/10.1162/jocn.1989.1.2.136>.
- 577 32. Jueptner, M., Rijntjes, M., Weiller, C., Faiss, J.H., Timmann, D., Mueller, S.P., and  
578 Diener, H.C. (1995). Localization of a cerebellar timing process using pet. *Neurology*  
579 45, 1540–1545.
- 580 33. Narain, D., Remington, E.D., Zeeuw, C.I. De, and Jazayeri, M. (2018). A cerebellar  
581 mechanism for learning prior distributions of time intervals. *Nat. Commun.* 9, 469.  
582 Available at: <https://doi.org/10.1038/s41467-017-02516-x>.
- 583 34. Krakauer, J.W., and Mazzoni, P. (2011). Human sensorimotor learning: Adaptation,  
584 skill, and beyond. *Curr. Opin. Neurobiol.* 21, 636–644.
- 585 35. Kilteni, K., and Ehrsson, H.H. (2017). Body ownership determines the attenuation of  
586 self-generated tactile sensations. *Proc. Natl. Acad. Sci.*, 201703347. Available at:  
587 <http://www.pnas.org/content/early/2017/07/11/1703347114.full>.
- 588 36. Frith, C.D., Blakemore, S.J., and Wolpert, D.M. (2000). Abnormalities in the  
589 awareness and control of action. *Philos. Trans. R. Soc. Lond. B. Biol. Sci.* 355, 1771–  
590 1788.
- 591 37. Blakemore, S.J., and Frith, C. (2003). Self-awareness and action. *Curr. Opin.*  
592 *Neurobiol.* 13, 219–224.
- 593 38. Crapse, T.B., and Sommer, M.A. (2008). Corollary discharge across the animal  
594 kingdom. *Nat. Rev. Neurosci.* 9, 587–600.
- 595 39. Fletcher, P.C., and Frith, C.D. (2009). Perceiving is believing: A Bayesian approach to  
596 explaining the positive symptoms of schizophrenia. *Nat. Rev. Neurosci.* 10, 48–58.
- 597 40. Haggard, P. (2017). Sense of agency in the human brain. *Nat. Rev. Neurosci.* 18, 197–  
598 208.
- 599 41. Teufel, C., Kingdon, A., Ingram, J.N., Wolpert, D.M., and Fletcher, P.C. (2010).  
600 Deficits in sensory prediction are related to delusional ideation in healthy individuals.  
601 *Neuropsychologia* 48, 4169–4172. Available at:  
602 <http://dx.doi.org/10.1016/j.neuropsychologia.2010.10.024>.
- 603 42. Lemaitre, A.L., Luyat, M., and Lafargue, G. (2016). Individuals with pronounced  
604 schizotypal traits are particularly successful in tickling themselves. *Conscious. Cogn.*
- 605 43. Shergill, S.S., Samson, G., Bays, P.M., Frith, C.D., and Wolpert, D.M. (2005).  
606 Evidence for sensory prediction deficits in schizophrenia. *Am. J. Psychiatry* 162,  
607 2384–2386.
- 608 44. Shergill, S.S., White, T.P., Joyce, D.W., Bays, P.M., Wolpert, D.M., and Frith, C.D.



- 609 (2014). Functional magnetic resonance imaging of impaired sensory prediction in  
610 schizophrenia. *JAMA psychiatry* 71, 28–35. Available at:  
611 <http://www.ncbi.nlm.nih.gov/pubmed/24196370>.  
612 45. Blakemore, S.J., Smith, J., Steel, R., Johnstone, C.E., and Frith, C.D. (2000). The  
613 perception of self-produced sensory stimuli in patients with auditory hallucinations  
614 and passivity experiences: evidence for a breakdown in self-monitoring. *Psychol.*  
615 *Med.* 30, 1131–1139.  
616 46. Frith, C. (2005). The neural basis of hallucinations and delusions. *Comptes Rendus -*  
617 *Biol.* 328, 169–175.  
618 47. Whitford, T.J., Ford, J.M., Mathalon, D.H., Kubicki, M., and Shenton, M.E. (2012).  
619 Schizophrenia, myelination, and delayed corollary discharges: A hypothesis.  
620 *Schizophr. Bull.*  
621 48. Whitford, T.J., Mathalon, D.H., Shenton, M.E., Roach, B.J., Bammer, R., Adcock,  
622 R.A., Bouix, S., Kubicki, M., De Siebenthal, J., Rausch, A.C., *et al.* (2011).  
623 Electrophysiological and diffusion tensor imaging evidence of delayed corollary  
624 discharges in patients with schizophrenia. *Psychol. Med.* 41, 959–969.  
625 49. Oldfield, R.C. (1971). The assessment and analysis of handedness: the Edinburgh  
626 inventory. *Neuropsychologia* 9, 97–113.  
627
